# Supplementary material for: CD56-negative NK cells: Frequency in peripheral blood, expansion during HIV-1 infection, functional capacity, and KIR expression
Source: Frontiers journal article supplement (doi:10.3389/fimmu.2022.992723), 2022-09-23
Supplement: Table_3.DOCX [file Table_3.DOCX]

Excluded References

| **Number** | **Author and Year** | **Reason for Exclusion** |
| --- | --- | --- |
| 1 | (Cummings et al., 2022) | CD56neg NK definition based on RNAseq with no extractable data |
| 2 | (Chen et al., 2022) | Did not meet our CD56neg NK definition |
| 3 | (George et al., 2022) | Met CD56neg NK definition, but extractable data did not fit our analysis – only HIV-1+ groups and no data for comparing CD56dim to CD56neg NK cells |
| 4 | (Choi et al., 2021) | Did not meet our CD56neg NK definition |
| 5 | (Cao et al., 2021) | Did not meet our CD56neg NK definition |
| 6 | (Zhang et al., 2021) | Did not meet our CD56neg NK definition |
| 7 | (Desimio et al., 2021) | Did not meet our CD56neg NK definition |
| 8 | (Sun et al., 2021) | Did not meet our CD56neg NK definition |
| 9 | (Doria et al., 2021) | Did not meet our CD56neg NK definition |
| 10 | (Chretien et al., 2021) | Did not meet our CD56neg NK definition |
| 11 | (Lee et al., 2021) | Did not meet our CD56neg NK definition |
| 12 | (Gelbard et al., 2021) | Met CD56neg NK definition, but extractable data did not fit our analysis – only absolute CD56neg count available |
| 13 | (Chen et al., 2021) | Did not meet our CD56neg NK definition |
| 14 | (Bozzano et al., 2021) | Met CD56neg NK definition, but extractable data did not fit our analysis – CD56neg data from cultured cells and were not assumed to represent *in vivo* populations |
| 15 | (Wiedemann et al., 2020) | Did not meet our CD56neg NK definition |
| 16 | (Marcos-Jimenez et al., 2021) | Did not meet our CD56neg NK definition |
| 17 | (Orrantia et al., 2020) | Met CD56neg NK definition, but was a protocol paper without extractable data |
| 18 | (Smith et al., 2020) | Met CD56neg NK definition, but extractable data did not fit our analysis – gene expression data from scRNAseq dataset |
| 19 | (Soares et al., 2020) | Did not meet our CD56neg NK definition |
| 20 | (Utay et al., 2020) | Did not meet our CD56neg NK definition |
| 21 | (Alecsandru et al., 2020) | Did not meet our CD56neg NK definition |
| 22 | (Ma et al., 2019) | Did not meet our CD56neg NK definition |
| 23 | (Jin et al., 2019) | Did not meet our CD56neg NK definition |
| 24 | (Yang et al., 2019) | Met CD56neg NK definition, but extractable data did not fit our analysis – gene expression data from scRNAseq dataset |
| 25 | (Voigt et al., 2018) | Met CD56neg NK definition, but extractable data did not fit our analysis – proteomic data |
| 26 | (Forconi et al., 2018) | Did not meet our CD56neg NK definition |
| 27 | (Muccio et al., 2018) | Met CD56neg NK definition, but extractable data did not fit our analysis – CD56neg data from stem cell transplant patients |
| 28 | (Cimini et al., 2017) | Did not meet our CD56neg NK definition |
| 29 | (Zhang et al., 2017) | Did not meet our CD56neg NK definition |
| 30 | (Morais-Papini et al., 2017) | Did not meet our CD56neg NK definition |
| 31 | (Childs et al., 2017) | Did not meet our CD56neg NK definition |
| 32 | (Sips et al., 2016) | Did not meet our CD56neg NK definition |
| 33 | (Valenzuela-Membrives et al., 2016) | Did not meet our CD56neg NK definition |
| 34 | (Bersani et al., 2016) | Did not meet our CD56neg NK definition |
| 35 | (Mace et al., 2016) | Met CD56neg NK definition, but extractable data did not fit our analysis – CD56neg data related to motility |
| 36 | (Oh et al., 2016) | Met CD56neg NK definition, but extractable data did not fit our analysis – CD56neg data on a subset instead of for whole population |
| 37 | (Muccio et al., 2016) | Did not meet our CD56neg NK definition |
| 38 | (Campos et al., 2015) | Did not meet our CD56neg NK definition |
| 39 | (Horowitz et al., 2015) | Did not meet our CD56neg NK definition |
| 40 | (Frias et al., 2015) | Did not meet our CD56neg NK definition |
| 41 | (Jensen et al., 2015) | Did not meet our CD56neg NK definition |
| 42 | (de Kivit et al., 2015) | Did not meet our CD56neg NK definition |
| 43 | (Campos et al., 2014a) | Did not meet our CD56neg NK definition |
| 44 | (Campos et al., 2014b) | Did not meet our CD56neg NK definition |
| 45 | (Wang et al., 2014) | Did not meet our CD56neg NK definition |
| 46 | (Trifonova et al., 2013) | Did not meet our CD56neg NK definition |
| 47 | (Farnault et al., 2013) | Did not meet our CD56neg NK definition, in addition to being a case study |
| 48 | (Prada et al., 2013) | Did not meet our CD56neg NK definition |
| 49 | (Mamessier et al., 2013) | Did not meet our CD56neg NK definition |
| 50 | (Okamura et al., 2013) | Did not meet our CD56neg NK definition |
| 51 | (Jia et al., 2013) | Did not meet our CD56neg NK definition |
| 52 | (Slyker et al., 2012) | Did not meet our CD56neg NK definition |
| 53 | (Cruz et al., 2012) | Did not meet our CD56neg NK definition |
| 54 | (Wiesmayr et al., 2012) | Did not meet our CD56neg NK definition |
| 55 | (Pena et al., 2012) | Did not meet our CD56neg NK definition |
| 56 | (Kulkarni et al., 2012) | Did not meet our CD56neg NK definition |
| 57 | (Alter et al., 2011) | Did not meet our CD56neg NK definition |
| 58 | (De Angelis et al., 2011) | Met CD56neg NK definition, but extractable data did not fit our analysis – CD56neg data not from CD16-defined cells |
| 59 | (Vieillard et al., 2010) | Did not meet our CD56neg NK definition |
| 60 | (Mantegani et al., 2010) | Did not meet our CD56neg NK definition |
| 61 | (Muzzioli et al., 2009) | Did not meet our CD56neg NK definition |
| 62 | (Zarife et al., 2009) | Did not meet our CD56neg NK definition |
| 63 | (Mestre et al., 2008) | Did not meet our CD56neg NK definition |
| 64 | (Lu et al., 2008) | Did not meet our CD56neg NK definition |
| 65 | (Nguyen et al., 2006) | Did not meet our CD56neg NK definition, in addition to being a case study |
| 66 | (Alter et al., 2006) | Did not meet our CD56neg NK definition |
| 67 | (Harada et al., 2005) | Did not meet our CD56neg NK definition, in addition to being a humanised mouse study |
| 68 | (Alter et al., 2005) | Did not meet our CD56neg NK definition |
| 69 | (Tarazona et al., 2002) | Did not meet our CD56neg NK definition |
| 70 | (Carayol et al., 1998) | Did not meet our CD56neg NK definition, also data was from cultured cells and not assumed to represent *in vivo* populations |
| 71 | (Hu et al., 1995) | Met CD56neg NK definition, but extractable data did not fit our analysis – only absolute CD56neg count and CD56neg % lymphocytes available |
| 72 | (Rigal et al., 1994) | Did not meet our CD56neg NK definition |
| 73 | (Bradstock et al., 1993) | Met CD56neg NK definition, but extractable data did not fit our analysis – only marker expression based on CD56+/- expression without being CD56-CD16+ |
| 74 | (Vitolo et al., 1993) | Met CD56neg NK definition, but extractable data did not fit our analysis – only RNA expression and on varied CD56neg definition |
| 75 | (McKenzie et al., 1992) | Met CD56neg NK definition, but extractable data did not fit our analysis – only lytic units given specifically for CD56neg cells |
| 76 | (Yu et al., 1991) | Did not meet our CD56neg NK definition |
| 77 | (Ellis and Fisher, 1989) | Did not meet our CD56neg NK definition |
| 78 | (Lanier et al., 1986) | Did not meet our CD56neg NK definition |

Alecsandru, D., Pacheco, A., Guerrero-Mayo, A., Fabris, A., Aparicio, P., Barrio, A., Pellicer, A., Garcia-Velasco, J.A., 2020. Ovarian stimulation does not influence the uterine immune environment in healthy infertile women. Reprod Biomed Online 40, 113-123.

Alter, G., Jost, S., Rihn, S., Reyor, L.L., Nolan, B.E., Ghebremichael, M., Bosch, R., Altfeld, M., Lauer, G.M., 2011. Reduced frequencies of NKp30+NKp46+, CD161+, and NKG2D+NK cells in acute HCV infection may predict viral clearance. Journal of Hepatology 55, 278-288.

Alter, G., Suscovich, T.J., Kleyman, M., Teigen, N., Streeck, H., Zaman, M.T., Meier, A., Altfeld, M., 2006. Low perforin and elevated SHIP-1 expression is associated with functional anergy of natural killer cells in chronic HIV-1 infection. Aids 20, 1549-1551.

Alter, G., Teigen, N., Davis, B.T., Addo, M.M., Suscovich, T.J., Waring, M.T., Streeck, H., Johnston, M.N., Staller, K.D., Zaman, M.T., Yu, X.G., Lichterfeld, M., Basgoz, N., Rosenberg, E.S., Altfeld, M., 2005. Sequential deregulation of NK cell subset distribution and function starting in acute HIV-1 infection. Blood 106, 3366-3369.

Bersani, F.S., Wolkowitz, O.M., Milush, J.M., Sinclair, E., Eppling, L., Aschbacher, K., Lindqvist, D., Yehuda, R., Flory, J., Bierer, L.M., Matokine, L., Abu-Amara, D., Reus, V.I., Coy, M., Hough, C.M., Marmar, C.R., Mellon, S.H., 2016. A population of atypical CD56(-)CD16(+) natural killer cells is expanded in PTSD and is associated with symptom severity. Brain Behavior and Immunity 56, 264-270.

Bozzano, F., Della Chiesa, M., Pelosi, A., Antonini, F., Ascierto, M.L., Del Zotto, G., Moretta, F., Muccio, L., Luganini, A., Gribaudo, G., Cenderello, G., Dentone, C., Nicolini, L., Moretta, A., Moretta, L., De Maria, A., 2021. HCMV-controlling NKG2C+ NK cells originate from novel circulating inflammatory precursors. J Allergy Clin Immunol.

Bradstock, K.F., Luxford, C., Grimsley, P.G., 1993. FUNCTIONAL AND PHENOTYPIC ASSESSMENT OF NEONATAL HUMAN-LEUKOCYTES EXPRESSING NATURAL-KILLER CELL-ASSOCIATED ANTIGENS. Immunology and Cell Biology 71, 535-542.

Campos, C., Lopez, N., Pera, A., Gordillo, J.J., Hassouneh, F., Tarazona, R., Solana, R., 2015. Expression of NKp30, NKp46 and DNAM-1 activating receptors on resting and IL-2 activated NK cells from healthy donors according to CMV-serostatus and age. Biogerontology 16, 671-683.

Campos, C., Pera, A., Lopez-Fernandez, I., Alonso, C., Tarazona, R., Solana, R., 2014a. Proinflammatory status influences NK cells subsets in the elderly. Immunology Letters 162, 298-302.

Campos, C., Pera, A., Sanchez-Correa, B., Alonso, C., Lopez-Fernandez, I., Morgado, S., Tarazona, R., Solana, R., 2014b. Effect of age and CMV on NK cell subpopulations. Experimental Gerontology 54, 130-137.

Cao, W.J., Zhang, X.C., Wan, L.Y., Li, Q.Y., Mu, X.Y., Guo, A.L., Zhou, M.J., Shen, L.L., Zhang, C., Fan, X., Jiao, Y.M., Xu, R.N., Zhou, C.B., Yuan, J.H., Wang, S.Q., Wang, F.S., Song, J.W., 2021. Immune Dysfunctions of CD56(neg) NK Cells Are Associated With HIV-1 Disease Progression. Front Immunol 12, 811091.

Carayol, G., Robin, C., Bourhis, J.M., Griscelli, A.B., Chouaib, S., Coulombel, L., Caignard, A., 1998. NK cells differentiated from bone marrow, cord blood and peripheral blood stem cells exhibit similar phenotype and functions. European Journal of Immunology 28, 1991-2002.

Chen, G., Qin, C.J., Wu, M.Z., Liu, F.F., Liu, S.S., Liu, L., 2021. The Frequency of Natural Killer Cell Subsets in Patients with Acquired Immune Deficiency Syndrome with Deep Fungal Infections. Infection and Drug Resistance 14, 467-473.

Chen, Y.C., Weng, S.W., Ding, J.Y., Lee, C.H., Ku, C.L., Huang, W.C., You, H.L., Huang, W.T., 2022. Clinicopathological Manifestations and Immune Phenotypes in Adult-Onset Immunodeficiency with Anti-interferon-γ Autoantibodies. J Clin Immunol.

Childs, K., Merritt, E., Considine, A., Sanchez-Fueyo, A., Agarwal, K., Martinez-Llordella, M., Carey, I., 2017. Immunological Predictors of Nonresponse to Directly Acting Antiviral Therapy in Patients With Chronic Hepatitis C and Decompensated Cirrhosis. Open Forum Infectious Diseases 4, 8.

Choi, I.S., Lee, M.J., Choi, S.A., Choi, K.S., Jeong, I.S., Cho, H.J., 2021. Circulating Immune Cell Profile and Changes in Intravenous Immunoglobulin Responsiveness Over the Disease Course in Children With Kawasaki Disease. Front Pediatr 9, 792870.

Chretien, A.S., Devillier, R., Granjeaud, S., Cordier, C., Demerle, C., Salem, N., Wlosik, J., Orlanducci, F., Gorvel, L., Fattori, S., Hospital, M.A., Pakradouni, J., Gregori, E., Paul, M., Rochigneux, P., Pagliardini, T., Morey, M., Fauriat, C., Dulphy, N., Toubert, A., Luche, H., Malissen, M., Blaise, D., Nunes, J.A., Vey, N., Olive, D., 2021. High-dimensional mass cytometry analysis of NK cell alterations in AML identifies a subgroup with adverse clinical outcome. Proceedings of the National Academy of Sciences of the United States of America 118, 11.

Cimini, E., Viola, D., Cabeza-Cabrerizo, M., Romanelli, A., Tumino, N., Sacchi, A., Bordoni, V., Casetti, R., Turchi, F., Martini, F., Bore, J.A., Koundouno, F.R., Duraffour, S., Michel, J., Holm, T., Zekeng, E.G., Cowley, L., Dorival, I.G., Doerrbecker, J., Hetzelt, N., Baum, J.H.J., Portmann, J., Wolfel, R., Gabriel, M., Miranda, O., Diaz, G., Diaz, J.E., Fleites, Y.A., Pineiro, C.A., Castro, C.M., Koivogui, L., Magassouba, N., Diallo, B., Ruibal, P., Oestereich, L., Wozniak, D.M., Ludtke, A., Becker-Ziaja, B., Capobianchi, M.R., Ippolito, G., Carroll, M.W., Gunther, S., Di Caro, A., Munoz-Fontela, C., Agrati, C., 2017. Different features of V delta 2 T and NK cells in fatal and non-fatal human Ebola infections. Plos Neglected Tropical Diseases 11, 11.

Cruz, A.R., Ramirez, L.G., Zuluaga, A.V., Pillay, A., Abreu, C., Valencia, C.A., La Vake, C., Cervantes, J.L., Dunham-Ems, S., Cartun, R., Mavilio, D., Radolf, J.D., Salazar, J.C., 2012. Immune Evasion and Recognition of the Syphilis Spirochete in Blood and Skin of Secondary Syphilis Patients: Two Immunologically Distinct Compartments. Plos Neglected Tropical Diseases 6, 18.

Cummings, M.J., Bakamutumaho, B., Price, A., Owor, N., Kayiwa, J., Namulondo, J., Byaruhanga, T., Muwanga, M., Nsereko, C., Sameroff, S., Tokarz, R., Wong, W., Shah, S.S., Larsen, M.H., Lipkin, W.I., Lutwama, J.J., O'Donnell, M.R., 2022. Multidimensional analysis of the host response reveals prognostic and pathogen-driven immune subtypes among adults with sepsis in Uganda. Critical Care 26, 15.

De Angelis, C., Mancusi, A., Ruggeri, L., Capanni, M., Urbani, E., Velardi, A., Stern, M., 2011. Expansion of CD56-Negative, CD16-Positive, KIR-Expressing Natural Killer Cells after T Cell-Depleted Haploidentical Hematopoietic Stem Cell Transplantation. Acta Haematologica 126, 13-20.

de Kivit, S., Lempsink, L.J., Plants, J., Martinson, J., Keshavarzian, A., Landay, A.L., 2015. Modulation of TIM-3 expression on NK and T cell subsets in HIV immunological non-responders. Clin Immunol 156, 28-35.

Desimio, M.G., Finocchi, A., Di Matteo, G., Di Cesare, S., Giancotta, C., Conti, F., Chessa, L., Piane, M., Montin, D., Dellepiane, M., Rossi, P., Cancrini, C., Doria, M., 2021. Altered NK-cell compartment and dysfunctional NKG2D/NKG2D-ligand axis in patients with ataxia-telangiectasia. Clin Immunol 230, 108802.

Doria, M., Zicari, S., Cotugno, N., Dominguez-Rodriguez, S., Ruggiero, A., Pascucci, G.R., Tagarro, A., Conejo, P.R., Nastouli, E., Gartner, K., Cameron, M., Richardson, B., Foster, C., Williams, S.L., Rinaldi, S., De Rossi, A., Giaquinto, C., Rossi, P., Pahwa, S., Palma, P., Consortium, E., 2021. Early ART initiation during infancy preserves natural killer cells in young European adolescents living with HIV (CARMA cohort). Journal of the International Aids Society 24, 10.

Ellis, T.M., Fisher, R.I., 1989. Functional heterogeneity of Leu 19"bright"+ and Leu 19"dim"+ lymphokine-activated killer cells. J Immunol 142, 2949-2954.

Farnault, L., Chambost, H., Michel, G., Thuret, I., de Saint Basile, G., Fischer, A., Picard, C., Orlanducci, F., Farnarier, C., Moretta, A., Olive, D., 2013. Persistence of natural killer cells with expansion of a hypofunctional CD56(-)CD16(+) KIR(+)NKG2C(+) subset in a patient with atypical Janus kinase 3-deficient severe combined immunodeficiency. Journal of Allergy and Clinical Immunology 131, 1230-+.

Forconi, C.S., Cosgrove, C.P., Saikumar-Lakshmi, P., Nixon, C.E., Foley, J., Ong'echa, J.M., Otieno, J.A., Alter, G., Munz, C., Moormann, A.M., 2018. Poorly cytotoxic terminally differentiated CD56(neg)CD16(pos) NK cells accumulate in Kenyan children with Burkitt lymphomas. Blood Advances 2, 1101-1114.

Frias, M., Rivero-Juarez, A., Gordon, A., Camacho, A., Cantisan, S., Cuenca-Lopez, F., Torre-Cisneros, J., Pena, J., Rivero, A., 2015. Persistence of Pathological Distribution of NK Cells in HIV-Infected Patients with Prolonged Use of HAART and a Sustained Immune Response. Plos One 10, 8.

Gelbard, R.B., Hensman, H., Schobel, S., Stempora, L.L., Moris, D., Dente, C.J., Buchman, T.G., Kirk, A.D., Elster, E., 2021. An integrative model using flow cytometry identifies nosocomial infection after trauma. Journal of Trauma and Acute Care Surgery 91, 47-53.

George, A.F., Luo, X.Y., Neidleman, J., Hoh, R., Vohra, P., Thomas, R., Shin, M.G., Lee, M., Blish, C.A., Deeks, S.G., Greene, W.C., Lee, S.L.A., Roan, N.R., 2022. Deep Phenotypic Analysis of Blood and Lymphoid T and NK Cells From HIV plus Controllers and ART-Suppressed Individuals. Frontiers in Immunology 13, 14.

Harada, H., Suzu, S., Ito, T., Okada, S., 2005. Selective expansion and engraftment of human CD16(+) NK cells in NOD/SCID mice. European Journal of Immunology 35, 3599-3609.

Horowitz, A., Guethlein, L.A., Nemat-Gorgani, N., Norman, P.J., Cooley, S., Miller, J.S., Parham, P., 2015. Regulation of Adaptive NK Cells and CD8 T Cells by HLA-C Correlates with Allogeneic Hematopoietic Cell Transplantation and with Cytomegalovirus Reactivation. J Immunol 195, 4524-4536.

Hu, P.F., Hultin, L.E., Hultin, P., Hausner, M.A., Hirji, K., Jewett, A., Bonavida, B., Detels, R., Giorgi, J.V., 1995. Natural killer cell immunodeficiency in HIV disease is manifest by profoundly decreased numbers of CD16+CD56+ cells and expansion of a population of CD16dimCD56- cells with low lytic activity. J Acquir Immune Defic Syndr Hum Retrovirol 10, 331-340.

Jensen, S.S., Hartling, H.J., Tingstedt, J.L., Larsen, T.K., Nielsen, S.D., Pedersen, C., Fomsgaard, A., Karlsson, I., 2015. HIV-Specific ADCC Improves After Antiretroviral Therapy and Correlates With Normalization of the NK Cell Phenotype. Jaids-Journal of Acquired Immune Deficiency Syndromes 68, 103-111.

Jia, M., Li, D., He, X., Zhao, Y., Peng, H., Ma, P., Hong, K., Liang, H., Shao, Y., 2013. Impaired natural killer cell-induced antibody-dependent cell-mediated cytotoxicity is associated with human immunodeficiency virus-1 disease progression. Clinical and Experimental Immunology 171, 107-116.

Jin, J.L., Xu, H.Q., Wu, R.H., Gao, N., Wu, N., Li, S.B., Niu, J.Q., 2019. Identification of key genes and pathways associated with different immune statuses of hepatitis B virus infection. Journal of Cellular and Molecular Medicine 23, 7474-7489.

Kulkarni, A., Paranjape, R., Thakar, M., 2012. Expansion of Defective NK Cells in Early HIV Type 1C Infection: A Consequence of Reduced CD161 Expression. Aids Research and Human Retroviruses 28, 100-105.

Lanier, L.L., Le, A.M., Civin, C.I., Loken, M.R., Phillips, J.H., 1986. The relationship of CD16 (Leu-11) and Leu-19 (NKH-1) antigen expression on human peripheral blood NK cells and cytotoxic T lymphocytes. Journal of Immunology 136, 4480-4486.

Lee, C.H., Jiang, B., Nakhaei-Nejad, M., Barilla, D., Blevins, G., Giuliani, F., 2021. Cross-sectional analysis of peripheral blood mononuclear cells in lymphopenic and non-lymphopenic relapsing-remitting multiple sclerosis patients treated with dimethyl fumarate. Multiple Sclerosis and Related Disorders 52, 10.

Lu, X.Z., Kondo, Y., Takamatsu, H., Ohata, K., Yamazaki, H., Takami, A., Akatsuka, Y., Nakao, S., 2008. CD16(+) CD56(-) NK cells in the peripheral blood of cord blood transplant recipients: a unique subset of NK cells possibly associated with graft-versus-leukemia effect. European Journal of Haematology 81, 18-25.

Ma, M.C., Yin, X.W., Zhao, X., Guo, C.X., Zhu, X.Y., Liu, T.T., Yang, M., Zhang, Z.N., Fu, Y.J., Liu, J., Xu, J.J., Ding, H.B., Han, X.X., Chu, Z.X., Shang, H., Jiang, Y.J., 2019. CD56(-)CD16(+) NK cells from HIV-infected individuals negatively regulate IFN-gamma production by autologous CD8(+) T cells. Journal of Leukocyte Biology 106, 1313-1323.

Mace, E.M., Gunesch, J.T., Dixon, A., Orange, J.S., 2016. Human NK cell development requires CD56-mediated motility and formation of the developmental synapse. Nature Communications 7, 13.

Mamessier, E., Pradel, L.C., Thibult, M.L., Drevet, C., Zouine, A., Jacquemier, J., Houvenaeghel, G., Bertucci, F., Birnbaum, D., Olive, D., 2013. Peripheral Blood NK Cells from Breast Cancer Patients Are Tumor-Induced Composite Subsets. Journal of Immunology 190, 2424-2436.

Mantegani, P., Tambussi, G., Galli, L., Din, C.T., Lazzarin, A., Fortis, C., 2010. Perturbation of the natural killer cell compartment during primary human immunodeficiency virus 1 infection primarily involving the CD56bright subset. Immunology 129, 220-233.

Marcos-Jimenez, A., Sanchez-Alonso, S., Alcaraz-Serna, A., Esparcia, L., Lopez-Sanz, C., Sampedro-Nunez, M., Mateu-Albero, T., Sanchez-Cerrillo, I., Martinez-Fleta, P., Gabrie, L., Guerola, L.D., Rodriguez-Frade, J.M., Casasnovas, J.M., Reyburn, H.T., Vales-Gomez, M., Lopez-Trascasa, M., Martin-Gayo, E., Calzada, M.J., Castaneda, S., de la Fuente, H., Gonzalez-Alvaro, I., Sanchez-Madrid, F., Munoz-Calleja, C., Alfranca, A., 2021. Deregulated cellular circuits driving immunoglobulins and complement consumption associate with the severity of COVID-19 patients. European Journal of Immunology 51, 634-647.

McKenzie, R.S., Simms, P.E., Helfrich, B.A., Fisher, R.I., Ellis, T.M., 1992. Identification of a Novel CD56- Lymphokine-Activated Killer-Cell Precursor in Cancer-Patients Receiving Recombinant Interleukin-2. Cancer Research 52, 6318-6322.

Mestre, G., Garcia, F., Martinez, E., Milinkovic, A., Lopez, A., Leon, A., Mora, B., Argelich, R., Lozano, J.M., Pena, J., Gatell, J.M., Plana, M., 2008. Short Communication Natural Killer Cells and Expression of KIR Receptors in Chronic HIV Type 1-Infected Patients after Different Strategies of Structured Therapy Interruption. Aids Research and Human Retroviruses 24, 1485-1495.

Morais-Papini, T.F., Coelho-dos-Reis, J.G.A., Wendling, A.P.B., Antonelli, L.R.D., Wowk, P.F., Bonato, V.L.D., Augusto, V.M., Eloi-Santos, S., Martins, O.A., Carneiro, C.M., Teixeira-Carvalho, A., 2017. Systemic Immunological changes in patients with distinct clinical outcomes during Mycobacterium tuberculosis infection. Immunobiology 222, 1014-1024.

Muccio, L., Bertaina, A., Falco, M., Pende, D., Meazza, R., Lopez-Botet, M., Moretta, L., Locatelli, F., Moretta, A., Della Chiesa, M., 2016. Analysis of memory-like natural killer cells in human cytomegalovirus-infected children undergoing alpha beta plus T and B cell-depleted hematopoietic stem cell transplantation for hematological malignancies. Haematologica 101, 371-381.

Muccio, L., Falco, M., Bertaina, A., Locatelli, F., Frassoni, F., Sivori, S., Moretta, L., Moretta, A., Della Chiesa, M., 2018. Late Development of Fc epsilon R gamma(neg) Adaptive Natural Killer Cells Upon Human Cytomegalovirus Reactivation in Umbilical Cord Blood Transplantation Recipients. Frontiers in Immunology 9, 17.

Muzzioli, M., Stecconi, R., Moresi, R., Provinciali, M., 2009. Zinc improves the development of human CD34+cell progenitors towards NK cells and increases the expression of GATA-3 transcription factor in young and old ages. Biogerontology 10, 593-604.

Nguyen, S., Morel, V., Le Garff-Tavernier, M., Bolgert, F., Leblond, V., Debre, P., Vieillard, V., 2006. Persistence of CD16(+)/CD56(-)/2B4(+) natural killer cells: A highly dysfunctional NK subset expanded-in ocular myasthenia gravis. Journal of Neuroimmunology 179, 117-125.

Oh, J.S., Ali, A.K., Kim, S., Corsi, D.J., Cooper, C.L., Lee, S.H., 2016. NK cells lacking Fc epsilon R gamma are associated with reduced liver damage in chronic hepatitis C virus infection. European Journal of Immunology 46, 1020-1029.

Okamura, A., Harada, K., Nio, M., Nakanuma, Y., 2013. Participation of natural killer cells in the pathogenesis of bile duct lesions in biliary atresia. Journal of Clinical Pathology 66, 99-108.

Orrantia, A., Terrén, I., Vitallé, J., Astarloa-Pando, G., Zenarruzabeitia, O., Borrego, F., 2020. Identification and Functional Analysis of Human CD56(neg) NK Cells by Flow Cytometry. STAR Protoc 1, 100149.

Pena, J., Frias, M., Castro-Orgaz, L., Gonzalez, R., Garcia, F., Gallart, T., Gatell, J.M., Plana, M., 2012. Effects on innate immunity of a therapeutic dendritic cell-based vaccine for HIV-1 infection. Viral Immunol 25, 37-44.

Prada, N., Antoni, G., Commo, F., Rusakiewicz, S., Semeraro, M., Boufassa, F., Lambotte, O., Meyer, L., Gougeon, M.L., Zitvogel, L., 2013. Analysis of NKp30/NCR3 isoforms in untreated HIV-1-infected patients from the ANRS SEROCO cohort. Oncoimmunology 2, 10.

Rigal, D., Vermotdesroches, C., Heitz, S., Bernaud, J., Alfonsi, F., Monier, J.C., 1994. EFFECTS OF INTRAVENOUS IMMUNOGLOBULINS (IVIG) ON PERIPHERAL-BLOOD B-CELL, NK-CELL, AND T-CELL SUBPOPULATIONS IN WOMEN WITH RECURRENT SPONTANEOUS-ABORTIONS SPECIFIC EFFECTS ON LFA-1 AND CD56 MOLECULES. Clinical Immunology and Immunopathology 71, 309-314.

Sips, M., Liu, Q.Q., Draghi, M., Ghebremichael, M., Berger, C.T., Suscovich, T.J., Sun, Y., Walker, B.D., Carrington, M., Altfeld, M., Brouckaert, P., De Jager, P.L., Alter, G., 2016. HLA-C levels impact natural killer cell subset distribution and function. Human Immunology 77, 1147-1153.

Slyker, J.A., Lohman-Payne, B., John-Stewart, G.C., Dong, T., Mbori-Ngacha, D., Tapia, K., Atzberger, A., Taylor, S., Rowland-Jones, S.L., Blish, C.A., 2012. The impact of HIV-1 infection and exposure on natural killer (NK) cell phenotype in Kenyan infants during the first year of life. Frontiers in Immunology 3, 16.

Smith, S.L., Kennedy, P.R., Stacey, K.B., Worboys, J.D., Yarwood, A., Seo, S., Solloa, E.H., Mistretta, B., Chatterjee, S.S., Gunaratne, P., Allette, K., Wang, Y.C., Smith, M.L., Sebra, R., Mace, E.M., Horowitz, A., Thomson, W., Martin, P., Eyre, S., Davis, D.M., 2020. Diversity of peripheral blood human NK cells identified by single-cell RNA sequencing. Blood Advances 4, 1388-1406.

Soares, L.S., Espindola, M.S., Zambuzi, F.A., Galvao-Lima, L.J., Cacemiro, M.C., Soares, M.R., Santana, B.A., Calado, R.T., Bollela, V.R., Frantz, F.G., 2020. Immunosenescence in chronic HIV infected patients impairs essential functions of their natural killer cells. International Immunopharmacology 84, 8.

Sun, S.Y., Kong, W.Z., Cui, X.Y., Lin, Y., Lu, B.B., Pan, Y., Huang, J.P., Hu, X.Z., 2021. The abnormal distribution of NK cell subsets before HAART treatment may be related to the level of immune reconstitution in HIV patient. International Immunopharmacology 96, 8.

Tarazona, R., Casado, J.G., Delarosa, O., Torre-Cisneros, J., Villanueva, J.L., Sanchez, B., Galiani, M.D., Gonzalez, R., Solana, R., Pena, J., 2002. Selective depletion of CD56(dim) NK cell subsets and maintenance of CD56(bright) NK cells in treatment-naive HIV-1-seropositive individuals. Journal of Clinical Immunology 22, 176-183.

Trifonova, S.T., Zimmer, J., Turner, J.D., Muller, C.P., 2013. Diurnal redistribution of human lymphocytes and their temporal associations with salivary cortisol. Chronobiology International 30, 669-681.

Utay, N.S., Vigil, K.J., Somasunderam, A., Aulicino, P.C., Smulevitz, B., Chiadika, S., Wolf, D.S., Kimata, J.T., Arduino, R.C., 2020. Timing of Antiretroviral Therapy Initiation Determines Rectal Natural Killer Cell Populations. Aids Research and Human Retroviruses 36, 314-323.

Valenzuela-Membrives, M.D., Perea-Garcia, F., Sanchez-Palencia, A., Ruiz-Cabello, F., Gomez-Morales, M., Miranda-Leon, M.T., Galindo-Angel, I., Farez-Vida, M.E., 2016. Progressive changes in composition of lymphocytes in lung tissues from patients with non-small-cell lung cancer. Oncotarget 7, 71608-71619.

Vieillard, V., Fausther-Bovendo, H., Samri, A., Debre, P., French Asymptomatiques Long, T., 2010. Specific Phenotypic and Functional Features of Natural Killer Cells From HIV-Infected Long-Term Nonprogressors and HIV Controllers. Jaids-Journal of Acquired Immune Deficiency Syndromes 53, 564-573.

Vitolo, D., Vujanovic, N.L., Rabinowich, H., Schlesinger, M., Herberman, R.B., Whiteside, T.L., 1993. RAPID IL-2-INDUCED ADHERENCE OF HUMAN NATURAL-KILLER-CELLS - EXPRESSION OF MESSENGER-RNA FOR CYTOKINES AND IL-2 RECEPTORS IN ADHERENT NK-CELLS. Journal of Immunology 151, 1926-1937.

Voigt, J., Malone, D.F.G., Dias, J., Leeansyah, E., Bjorkstrom, N.K., Ljunggren, H.G., Grobe, L., Klawonn, F., Heyner, M., Sandberg, J.K., Jansch, L., 2018. Proteome analysis of human CD56(neg) NK cells reveals a homogeneous phenotype surprisingly similar to CD56(dim) NK cells. European Journal of Immunology 48, 1456-1469.

Wang, S., Li, Y.P., Ding, B., Zhao, Y.R., Chen, Z.J., Xu, C.Y., Fu, Y.B., Wang, X.T., 2014. Recurrent miscarriage is associated with a decline of decidual natural killer cells expressing killer cell immunoglobulin-like receptors specific for human leukocyte antigen C. Journal of Obstetrics and Gynaecology Research 40, 1288-1295.

Wiedemann, A., Foucat, E., Hocini, H., Lefebvre, C., Hejblum, B.P., Durand, M., Kruger, M., Keita, A.K., Ayouba, A., Mely, S., Fernandez, J.C., Toure, A., Fourati, S., Levy-Marchal, C., Raoul, H., Delaporte, E., Koivogui, L., Thiebaut, R., Lacabaratz, C., Levy, Y., PostEboGui Study, G., 2020. Long-lasting severe immune dysfunction in Ebola virus disease survivors. Nature Communications 11, 11.

Wiesmayr, S., Webber, S.A., Macedo, C., Popescu, I., Smith, L., Luce, J., Metes, D., 2012. Decreased NKp46 and NKG2D and elevated PD-1 are associated with altered NK-cell function in pediatric transplant patients with PTLD. European Journal of Immunology 42, 541-550.

Yang, C., Siebert, J.R., Burns, R., Gerbec, Z.J., Bonacci, B., Rymaszewski, A., Rau, M., Riese, M.J., Rao, S., Carlson, K.S., Routes, J.M., Verbsky, J.W., Thakar, M.S., Malarkannan, S., 2019. Heterogeneity of human bone marrow and blood natural killer cells defined by single-cell transcriptome. Nature Communications 10, 16.

Yu, F., Itoyama, Y., Fujihara, K., Goto, I., 1991. Natural-Killer (NK) Cells in HTLV-I-Associated Myelopathy Tropical Spastic Paraparesis - Decrease in NK Cell Subset Populations and Activity in HTLV-I Seropositive Individuals. Journal of Neuroimmunology 33, 121-128.

Zarife, M.A., Reis, E.A., Carmo, T.M., Lopes, G.B., Brandão, E.C., Silva, H.R., Santana, N., Martins-Filho, O.A., Reis, M.G., 2009. Increased frequency of CD56Bright NK-cells, CD3-CD16+CD56- NK-cells and activated CD4+T-cells or B-cells in parallel with CD4+CDC25High T-cells control potentially viremia in blood donors with HCV. J Med Virol 81, 49-59.

Zhang, Y.P., Wang, H.F., Lou, X.Q., Qu, X.Z., Gao, L.C., Liu, X.L., Li, M., Guo, H., Jiang, Y.F., 2017. Decreased percentage of NKG2D+NK cells in patients with incident onset of Type 1 Diabetes. Clinical and Experimental Pharmacology and Physiology 44, 180-190.

Zhang, Z., Zhou, Y., Lu, J., Chen, Y.F., Hu, H.Y., Xu, X.Q., Fu, G.F., 2021. Changes in NK Cell Subsets and Receptor Expressions in HIV-1 Infected Chronic Patients and HIV Controllers. Frontiers in Immunology 12, 9.
